# Supplementary material for: Surface protein profiling of milk and serum extracellular vesicles unveils body fluid-specific signatures
Source: PubMed Central journal article supplement (PMC10229631; doi:10.1038/s41598-023-35799-w), 2023-05-30
Supplement: 41598_2023_35799_MOESM1_ESM.pdf [file 41598_2023_35799_MOESM1_ESM.pdf]

# **Surface protein profiling of milk and serum extracellular vesicles unveils body fluid-specific signatures**

Alberta Giovanazzi<sup>1,3</sup>, Martijn J.C. van Herwijnen<sup>1</sup>, Marije Kleinjan<sup>1</sup>, Gerbrich N. van der Meulen<sup>2</sup>,  
Marca H.M. Wauben<sup>1,3\*</sup>

1 Department of Biomolecular Health Sciences, Faculty of Veterinary Medicine, Utrecht University, Utrecht, The Netherlands

2 Paediatric Allergy Centre, Department of Paediatrics, Martini Hospital, Groningen, The Netherlands

3 TRAIN-EV Marie Skłodowska-Curie Action-ITN

\* m.h.m.wauben@uu.nl

## **SUPPLEMENTARY INFORMATION**

**Supplementary Table S1. Clinical parameters of milk and serum donors**

| <b>Donor number</b>                          | <b>1</b> | <b>2</b> | <b>3</b> | <b>4</b> | <b>5</b> | <b>6</b> | <b>7</b> | <b>8</b> | <b>9</b> |
|----------------------------------------------|----------|----------|----------|----------|----------|----------|----------|----------|----------|
| <b>Moternal age (years)</b>                  | 30       | 34       | 34       | 31       | 32       | 36       | 25       | 31       | 33       |
| <b>Lactational stage (weeks post-partum)</b> | 9        | 5        | 6        | 5        | 6        | 8        | 7        | 5        | 6        |
| <b>Number of full term deliveries</b>        | 2        | 4        | 2        | 2        | 2        | 1        | 1        | 1        | 3        |
| <b>Health status</b>                         | A        | NA       | A        | NA       | A        | NA       | A        | NA       | NA       |
| <b>Total IgE (kU/L)</b>                      | 73.6     | 24.7     | 243      | 27.8     | 141      | 38.9     | 81.9     | 30.4     | 9.6      |
| <b>grass pollen IgE (kU/L)</b>               | < LOD    | < LOD    | 0.97     | < LOD    | < LOD    | < LOD    | 1.3      | < LOD    | < LOD    |
| <b>tree pollen IgE (kU/L)</b>                | 7.6      | < LOD    | 40       | < LOD    | < LOD    | < LOD    | 7.7      | < LOD    | < LOD    |
| <b>house dust mite IgE (kU/L)</b>            | 1.0      | < LOD    | 4.2      | < LOD    | 3.8      | < LOD    | 4.4      | < LOD    | < LOD    |
| <b>cat dander IgE (kU/L)</b>                 | < LOD    | < LOD    | < LOD    | < LOD    | < LOD    | < LOD    | 0.49     | < LOD    | < LOD    |
| <b>dog dander IgE (kU/L)</b>                 | < LOD    | < LOD    | < LOD    | < LOD    | < LOD    | < LOD    | 1.1      | < LOD    | < LOD    |

LOD= limit of detection

A= allergic

NA=non-allergic

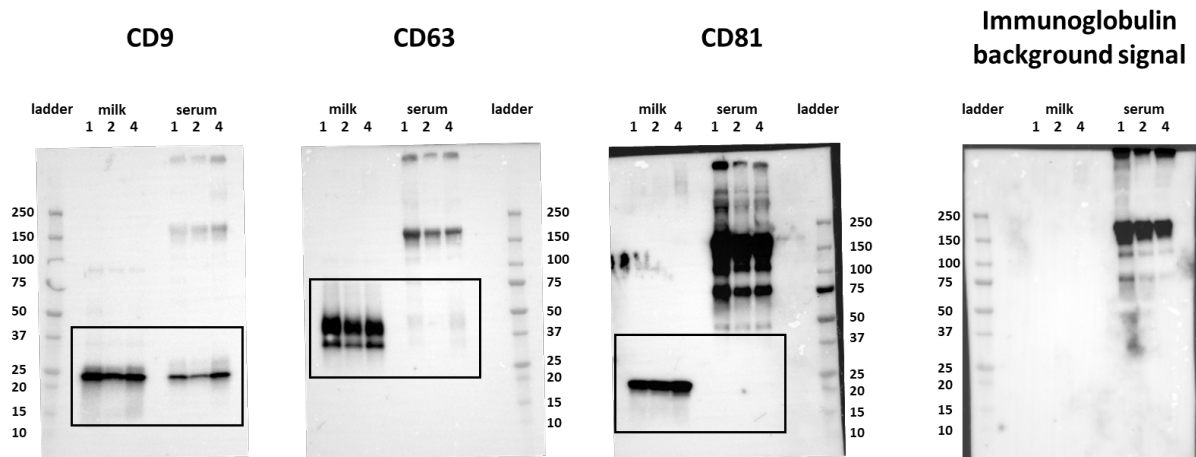

**Supplementary Figure S1. Quality controls of EV samples by Western blotting for tetraspanins.** Isolated EV samples from 3 different paired milk and serum donors (see Supplementary Table S1 for information on Donor 1, 2 and 4) were analysed by Western blotting (non-reduced conditions) for the presence of tetraspanin CD9 (24 kDa, exposure time 12 s), CD63 (37 kDa, exposure time 120 s), CD81 (26 kDa, exposure time 300 s) and immunoglobulin background signals (No primary antibody, only secondary goat-anti-mouse IgG-HRP. Heavy H chain: 50 kDa, light L chain: 25 kDa, 2H+2L= IgG: 150 kDa, 2H= 100 kDa, H+L= 75 kDa, exposure time 15 s). Input material of donors 1, 2 and 4 was normalised based on particle numbers as measured by NTA (Fig 1a) and  $11.5 \times 10^9$  particles were used of each sample for Western blot analysis. Hereto, corresponding volumes of isolated EV samples were pelleted for 35 min at 100,000xg (in a Beckman Coulter Optima Max-XP with a TLA-55 rotor) in polyallomer microcentrifuge tubes (Beckman). The pellet was resuspended in sample buffer (62.5 mM Tris pH 6.8, 2% SDS, 10% Glycerol), heated at 95°C for 3 min, and run on an 8%–16% TGX-Criterion gel (Bio-Rad). The separated proteins were transferred to PVDF membranes and blocked in PBS containing 0.2% fish skin gelatin (Sigma-Aldrich) and 0.1% Tween-20. Proteins were detected by immunoblotting using mouse anti-human CD9 (clone HI9a, BioLegend, dilution 1:1,000), mouse anti-human CD63 (clone TS63, Abcam, dilution 1:1,000), or mouse anti-human CD81 (clone JS64, Immunotec, dilution 1:1,000). Goat anti-mouse-HRP (Jackson Immuno Research, Suffolk, UK; dilution 1:10,000), was used as secondary antibody. HRP conjugated antibodies were detected using SuperSignal West Dura Chemiluminescent Substrate (Thermo Scientific and ChemiDoc XRS and Image Lab 5.1 (Bio-Rad).

**a**

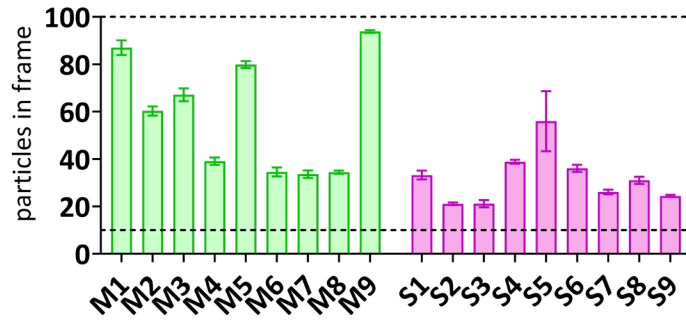

**b**

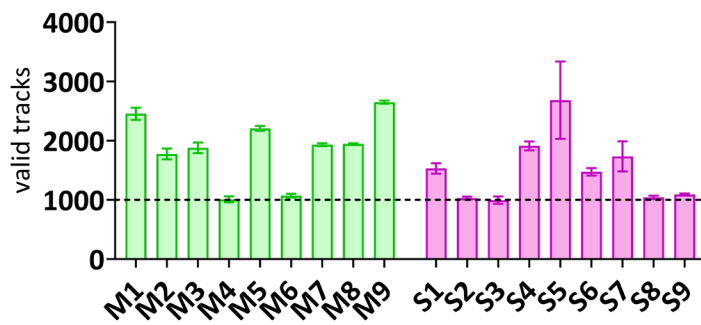

**Supplementary Figure S2. Technical quality controls for NTA.** To ensure reliable measurements, milk and serum EVs were diluted to reach 10-100 particles in frame (**a**) and at least 1,000 valid tracks as average of 3 captures per EV sample (**b**). The results shown are derived from n=9 individual milk samples (M1-M9) and paired serum samples (S1-S9).

**Supplementary Table S2. Raw bead counts and percentages of capture signals**

| samples                     | acquired events | beads    | single beads | APC <sup>+</sup> beads (FITC) | APC <sup>+</sup> beads (PE) | APC <sup>+</sup> beads (FITC) | APC <sup>+</sup> beads (PE) |
|-----------------------------|-----------------|----------|--------------|-------------------------------|-----------------------------|-------------------------------|-----------------------------|
|                             | (counts)        | (counts) | (counts)     | (counts)                      | (counts)                    | (% of single beads)           |                             |
| buffer                      | 17256           | 15947    | 15929        | 196                           | 195                         | 1.23                          | 1.22                        |
| 10 <sup>9</sup> milk 1      | 15579           | 11302    | 11077        | 3415                          | 3412                        | 30.8                          | 30.8                        |
| 10 <sup>9</sup> milk 2      | 17325           | 13074    | 13007        | 4074                          | 4065                        | 31.3                          | 31.3                        |
| 10 <sup>9</sup> milk 3      | 18106           | 13349    | 13290        | 4527                          | 4522                        | 34.1                          | 34                          |
| 7.5*10 <sup>8</sup> milk 1  | 16533           | 12543    | 12415        | 3344                          | 3333                        | 26.9                          | 26.8                        |
| 7.5*10 <sup>8</sup> milk 2  | 18137           | 14292    | 14240        | 4129                          | 4118                        | 29                            | 28.9                        |
| 7.5*10 <sup>8</sup> milk 3  | 17686           | 13392    | 13273        | 4198                          | 4189                        | 31.6                          | 31.6                        |
| 5*10 <sup>8</sup> milk 1    | 19146           | 14980    | 14805        | 3508                          | 3494                        | 23.7                          | 23.6                        |
| 5*10 <sup>8</sup> milk 2    | 17308           | 13267    | 13227        | 3359                          | 3351                        | 25.4                          | 25.3                        |
| 5*10 <sup>8</sup> milk 3    | 21644           | 17311    | 17156        | 5055                          | 5049                        | 29.5                          | 29.4                        |
| 2.5*10 <sup>8</sup> milk 1  | 12010           | 8988     | 8884         | 1925                          | 1926                        | 21.7                          | 21.7                        |
| 2.5*10 <sup>8</sup> milk 2  | 11750           | 8779     | 8764         | 2040                          | 2037                        | 23.3                          | 23.2                        |
| 2.5*10 <sup>8</sup> milk 3  | 10885           | 7913     | 7790         | 2119                          | 2117                        | 27.2                          | 27.2                        |
| 10 <sup>8</sup> milk 1      | 14984           | 11252    | 11196        | 2286                          | 2278                        | 20.4                          | 20.3                        |
| 10 <sup>8</sup> milk 2      | 16818           | 12852    | 12792        | 2629                          | 2621                        | 20.6                          | 20.5                        |
| 10 <sup>8</sup> milk 3      | 16757           | 13063    | 13010        | 2955                          | 2948                        | 22.7                          | 22.7                        |
| 5*10 <sup>8</sup> serum 1   | 18031           | 12344    | 12000        | 3784                          | 3766                        | 31.5                          | 31.4                        |
| 5*10 <sup>8</sup> serum 2   | 14758           | 10369    | 10316        | 4004                          | 3992                        | 38.8                          | 38.7                        |
| 5*10 <sup>8</sup> serum 3   | 19132           | 13693    | 13530        | 4035                          | 4023                        | 29.8                          | 29.7                        |
| 2.5*10 <sup>8</sup> serum 1 | 17481           | 12305    | 12041        | 2856                          | 2845                        | 23.7                          | 23.6                        |
| 2.5*10 <sup>8</sup> serum 2 | 15387           | 11029    | 10974        | 3400                          | 3379                        | 31                            | 30.8                        |
| 2.5*10 <sup>8</sup> serum 3 | 16943           | 12510    | 12120        | 2928                          | 2925                        | 24.2                          | 24.1                        |
| 10 <sup>8</sup> serum 1     | 17796           | 13336    | 13230        | 2291                          | 2280                        | 17.3                          | 17.2                        |
| 10 <sup>8</sup> serum 2     | 15949           | 11959    | 11711        | 2584                          | 2569                        | 22.1                          | 21.9                        |
| 10 <sup>8</sup> serum 3     | 13313           | 9847     | 9512         | 1972                          | 1966                        | 20.7                          | 20.7                        |
| 7.5*10 <sup>7</sup> serum 1 | 15056           | 10801    | 10566        | 1566                          | 1557                        | 14.8                          | 14.7                        |
| 7.5*10 <sup>7</sup> serum 2 | 13441           | 9759     | 9590         | 1859                          | 1846                        | 19.4                          | 19.2                        |
| 7.5*10 <sup>7</sup> serum 3 | 11509           | 8257     | 8053         | 1552                          | 1549                        | 19.3                          | 19.2                        |
| 5*10 <sup>7</sup> serum 1   | 18373           | 13975    | 13843        | 1722                          | 1710                        | 12.4                          | 12.4                        |
| 5*10 <sup>7</sup> serum 2   | 18019           | 14171    | 14001        | 1638                          | 1618                        | 11.7                          | 11.6                        |
| 5*10 <sup>7</sup> serum 3   | 15502           | 12136    | 11801        | 1875                          | 1868                        | 15.9                          | 15.8                        |

**Supplementary Table S2. Raw bead counts and percentages of MACSPlex bead capture signals.**

Acquired events is the number of events recorded in 135  $\mu$ l of volume at medium flow rate (30 sec/min). Beads were gated and single beads were the events used as input for the analysis of count or relative percentage of APC<sup>+</sup> bead populations (EVs bound to beads). Beads are distinguished from each others by their respective fluorescence characteristics using the lasers and optical filters for FITC and PE. Data were obtained from the gating strategy in Supplementary Fig. S2a. Data are shown in the bar graphs of Supplementary Fig. S2b.

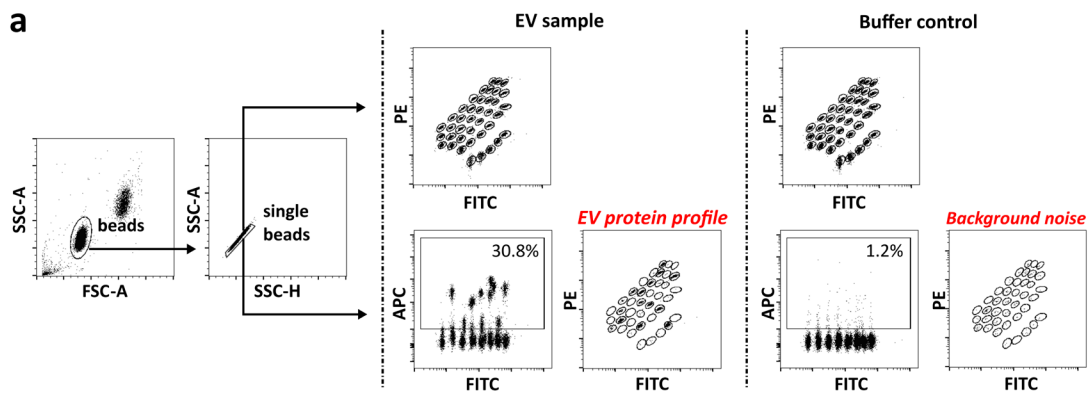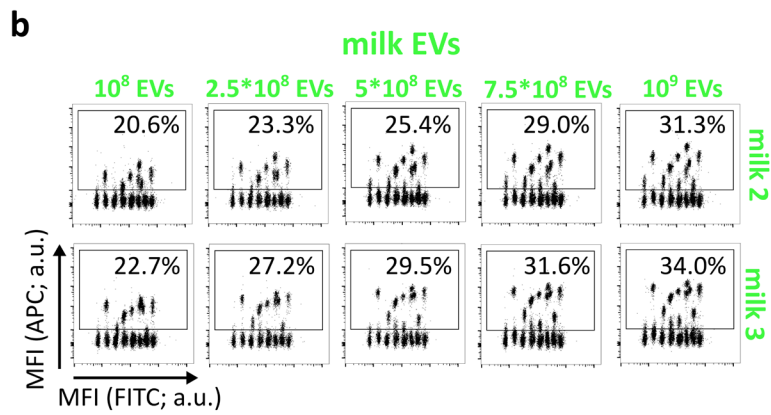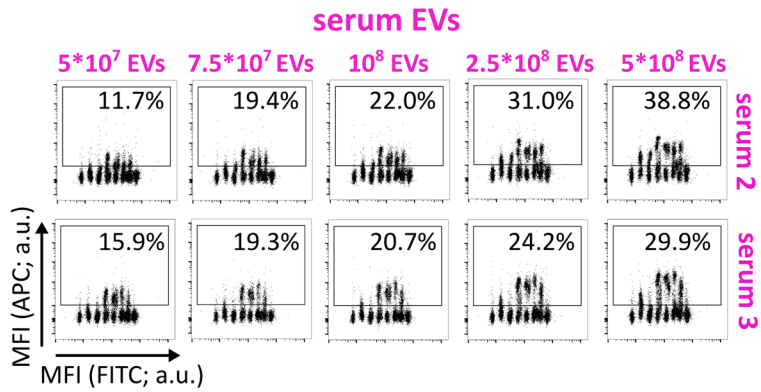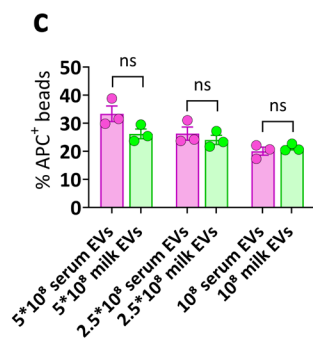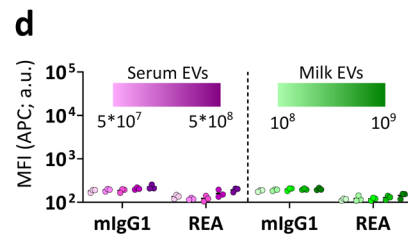

**Supplementary Figure S3. Titration of APC detection signals is proportional to input EV numbers. (a)** Overview of the MACSPlex gating strategies: events in 135  $\mu$ l were recorded at medium flow rate

(30sec/min). Beads were gated and single beads were used as input for the analysis of APC<sup>+</sup> bead populations (i.e. EVs bound to beads and detected by APC-conjugated tetraspanin antibodies). Beads were distinguished from each others based on their specific FITC and PE signals. **(b)** Flow cytometry dot plots of five input amounts of milk EVs (green) and serum EVs (pink) from donor 2 and 3 depicting the percentage of APC<sup>+</sup> beads (relative to single beads). See Supplementary Table S2 for further details on raw bead counts and percentage of capture signals. **(c)** Technical control: percentage of APC<sup>+</sup> beads (EVs bound to beads) in relation to input number of milk EVs and serum EVs. The graph depicts median with dots of donor 1, donor 2, donor 3. **(d)** Technical control: MFI APC relative to internal isotype controls mIgG1 and REA capture beads at different EV doses. The graph depicts median + min and max values (n=3 donors). a.u. = arbitrary unit.

**Supplementary Table S3: Raw MFI APC signal (pan-tetraspanin) of all 39 beads**

|         | <i>buffer</i> | <i>M1</i> | <i>M2</i> | <i>M3</i> | <i>M4</i> | <i>M5</i> | <i>M6</i> | <i>M7</i> | <i>M8</i> | <i>M9</i> | <i>S1</i> | <i>S2</i> | <i>S3</i> | <i>S4</i> | <i>S5</i> | <i>S6</i> | <i>S7</i> | <i>S8</i> | <i>S9</i> |
|---------|---------------|-----------|-----------|-----------|-----------|-----------|-----------|-----------|-----------|-----------|-----------|-----------|-----------|-----------|-----------|-----------|-----------|-----------|-----------|
| CD1c    | 125           | 125       | 195       | 291       | 213       | 305       | 195       | 245       | 172       | 220       | 222       | 1640      | 271       | 959       | 538       | 228       | 327       | 233       | 322       |
| CD2     | 141           | 204       | 258       | 428       | 297       | 193       | 485       | 314       | 310       | 243       | 202       | 267       | 182       | 209       | 239       | 254       | 265       | 226       | 228       |
| CD3     | 432           | 820       | 1918      | 1804      | 2089      | 2403      | 680       | 2023      | 1055      | 1399      | 295       | 479       | 316       | 228       | 314       | 258       | 248       | 191       | 274       |
| CD4     | 125           | 125       | 171       | 241       | 169       | 116       | 222       | 172       | 230       | 151       | 176       | 152       | 149       | 149       | 189       | 176       | 169       | 165       | 180       |
| CD8     | 101           | 204       | 308       | 422       | 250       | 211       | 444       | 282       | 261       | 252       | 1432      | 2314      | 1491      | 1333      | 1281      | 1766      | 1097      | 1618      | 1523      |
| CD9     | 125           | 6762      | 6639      | 14726     | 7534      | 10658     | 26482     | 8171      | 33644     | 8019      | 5754      | 7724      | 13842     | 2740      | 9595      | 6762      | 14871     | 3230      | 14969     |
| CD11c   | 138           | 149       | 132       | 250       | 149       | 187       | 151       | 178       | 176       | 141       | 853       | 263       | 231       | 140       | 176       | 140       | 169       | 165       | 140       |
| CD14    | 305           | 24353     | 25099     | 54009     | 37119     | 33305     | 38141     | 32746     | 126955    | 15878     | 485       | 639       | 687       | 511       | 698       | 399       | 538       | 553       | 493       |
| CD19    | 143           | 163       | 200       | 217       | 217       | 333       | 198       | 196       | 178       | 136       | 280       | 513       | 274       | 259       | 728       | 198       | 261       | 352       | 263       |
| CD20    | 280           | 343       | 373       | 493       | 446       | 570       | 446       | 434       | 483       | 348       | 350       | 731       | 375       | 348       | 738       | 327       | 389       | 432       | 316       |
| CD24    | 162           | 16735     | 6659      | 41808     | 11510     | 29196     | 26042     | 17013     | 40547     | 14207     | 1012      | 970       | 522       | 905       | 3167      | 790       | 978       | 950       | 1257      |
| CD25    | 401           | 195       | 219       | 356       | 346       | 547       | 219       | 288       | 254       | 196       | 273       | 651       | 263       | 348       | 858       | 195       | 274       | 341       | 224       |
| CD29    | 116           | 967       | 918       | 3028      | 1287      | 2651      | 6245      | 1020      | 4442      | 1507      | 2786      | 6700      | 6439      | 1091      | 7772      | 4058      | 6170      | 1115      | 4390      |
| CD31    | 172           | 172       | 198       | 387       | 195       | 329       | 436       | 436       | 442       | 176       | 1052      | 761       | 1693      | 538       | 4574      | 1257      | 1819      | 479       | 2175      |
| CD40    | 256           | 267       | 284       | 493       | 274       | 339       | 717       | 335       | 405       | 288       | 937       | 992       | 2163      | 409       | 4301      | 850       | 1322      | 507       | 2615      |
| CD41b   | 337           | 373       | 362       | 517       | 360       | 678       | 474       | 440       | 553       | 360       | 8755      | 6226      | 6558      | 2163      | 14823     | 12356     | 15878     | 3690      | 19741     |
| CD42a   | 118           | 156       | 101       | 147       | 140       | 198       | 105       | 132       | 151       | 138       | 8978      | 5806      | 23008     | 1766      | 23790     | 12080     | 26042     | 2320      | 27204     |
| CD44    | 258           | 373       | 339       | 557       | 401       | 466       | 1106      | 448       | 604       | 358       | 393       | 578       | 540       | 483       | 2538      | 735       | 1094      | 528       | 761       |
| CD45    | 269           | 282       | 293       | 483       | 312       | 352       | 430       | 368       | 430       | 288       | 411       | 362       | 483       | 401       | 1644      | 551       | 604       | 345       | 931       |
| CD49e   | 215           | 193       | 184       | 265       | 213       | 182       | 200       | 213       | 196       | 228       | 261       | 211       | 219       | 217       | 750       | 207       | 335       | 200       | 356       |
| CD56    | 671           | 815       | 626       | 664       | 566       | 800       | 624       | 825       | 666       | 559       | 428       | 507       | 454       | 432       | 364       | 393       | 354       | 322       | 430       |
| CD62P   | 97.7          | 202       | 81.4      | 95.9      | 81.4      | 134       | 85        | 92.3      | 120       | 86.8      | 7126      | 5949      | 17525     | 964       | 15723     | 11111     | 24682     | 3765      | 21667     |
| CD63    | 230           | 6867      | 6931      | 22179     | 9504      | 11147     | 11510     | 6095      | 36619     | 7039      | 10225     | 17525     | 25954     | 3341      | 19417     | 10899     | 13797     | 6598      | 22105     |
| CD69    | 184           | 299       | 289       | 576       | 545       | 1026      | 312       | 379       | 639       | 239       | 479       | 1523      | 553       | 327       | 1287      | 325       | 540       | 572       | 481       |
| CD81    | 191           | 15569     | 20681     | 33758     | 22253     | 25695     | 55509     | 21098     | 64997     | 19035     | 9595      | 8069      | 9223      | 6303      | 10624     | 8171      | 9841      | 9092      | 10726     |
| CD86    | 209           | 265       | 312       | 474       | 379       | 624       | 341       | 329       | 343       | 245       | 243       | 524       | 271       | 269       | 460       | 243       | 295       | 671       | 245       |
| CD105   | 196           | 452       | 356       | 810       | 515       | 778       | 622       | 430       | 2371      | 368       | 1067      | 669       | 669       | 553       | 717       | 485       | 628       | 454       | 530       |
| CD133/1 | 239           | 30197     | 10323     | 43701     | 13355     | 12119     | 29000     | 5516      | 180227    | 17994     | 387       | 1184      | 680       | 515       | 918       | 549       | 648       | 581       | 476       |
| CD142   | 274           | 346       | 337       | 454       | 373       | 389       | 442       | 391       | 495       | 325       | 265       | 314       | 360       | 291       | 324       | 293       | 295       | 335       | 284       |
| CD146   | 235           | 918       | 983       | 1519      | 771       | 1593      | 3659      | 1165      | 1954      | 931       | 609       | 440       | 515       | 393       | 381       | 391       | 327       | 375       | 345       |
| CD209   | 94.1          | 94.1      | 138       | 154       | 101       | 123       | 118       | 136       | 132       | 120       | 112       | 187       | 114       | 95.9      | 158       | 77.8      | 95.9      | 174       | 120       |
| CD326   | 585           | 49245     | 62803     | 86494     | 44452     | 65897     | 161834    | 54195     | 109019    | 56857     | 511       | 3909      | 921       | 622       | 781       | 491       | 517       | 873       | 505       |
| mIgG1   | 202           | 191       | 222       | 370       | 220       | 306       | 362       | 377       | 358       | 217       | 191       | 256       | 200       | 312       | 413       | 295       | 343       | 333       | 202       |
| REA     | 132           | 149       | 147       | 158       | 136       | 180       | 101       | 149       | 180       | 143       | 182       | 226       | 189       | 125       | 191       | 118       | 123       | 136       | 143       |
| HLA-I   | 462           | 850       | 738       | 1539      | 611       | 581       | 4494      | 637       | 1109      | 536       | 992       | 902       | 1134      | 589       | 2961      | 1555      | 3456      | 553       | 2470      |
| HLA-II  | 171           | 16516     | 21885     | 54942     | 30710     | 9873      | 127396    | 12003     | 87999     | 16035     | 1653      | 3114      | 2637      | 3062      | 2234      | 2175      | 3322      | 2192      | 3131      |
| MCSP    | 202           | 206       | 248       | 297       | 276       | 385       | 278       | 267       | 252       | 217       | 233       | 520       | 289       | 250       | 377       | 246       | 278       | 346       | 256       |
| ROR1    | 213           | 915       | 1503      | 4058      | 1893      | 2817      | 16194     | 1200      | 3408      | 2371      | 1274      | 3071      | 745       | 820       | 1734      | 405       | 764       | 1124      | 1152      |
| SSEA-4  | 368           | 424       | 397       | 460       | 458       | 752       | 356       | 297       | 470       | 413       | 301       | 764       | 411       | 284       | 530       | 258       | 288       | 310       | 446       |

**Supplementary Table S3. Raw MFI APC signal (pan-tetraspanin) of all 39 bead populations of the MACSPlex Exosome kit.** Raw MFI APC intensities of each capture bead population without background and isotype corrections are indicated. M1-M9 refers to milk EV samples of n=9 individual donors, while S1-S9 are the paired serum EV samples.



**Supplementary Table S4\_Dunn's multiple comparisons test isotype VS proteins**

| <b>milk</b>    |                 |                  |             | <b>serum</b>   |                 |                  |             |
|----------------|-----------------|------------------|-------------|----------------|-----------------|------------------|-------------|
|                | Mean rank diff. | Adj p value      | Significant |                | Mean rank diff. | Adj p value      | Significant |
| CD1c           | -62             | >0.99            | ns          | CD1c           | -113            | 0.62             | ns          |
| CD2            | -107            | 0.91             | ns          | CD2            | -45             | >0.99            | ns          |
| <b>CD3</b>     | <b>-198</b>     | <b>0.001</b>     | <b>**</b>   | CD3            | 0               | >0.99            | ns          |
| CD4            | -36             | >0.99            | ns          | CD4            | -26             | >0.99            | ns          |
| CD8            | -126            | 0.29             | ns          | <b>CD8</b>     | <b>-210</b>     | <b>&lt;0.001</b> | <b>***</b>  |
| <b>CD9</b>     | <b>-246</b>     | <b>&lt;0.001</b> | <b>***</b>  | <b>CD9</b>     | <b>-264</b>     | <b>&lt;0.001</b> | <b>***</b>  |
| CD11c          | -9.9            | >0.99            | ns          | CD11c          | -47             | >0.99            | ns          |
| <b>CD14</b>    | <b>-276</b>     | <b>&lt;0.001</b> | <b>***</b>  | CD14           | -115            | 0.58             | ns          |
| CD19           | -50             | >0.99            | ns          | CD19           | -88             | >0.99            | ns          |
| CD20           | -107            | 0.88             | ns          | CD20           | -69             | >0.99            | ns          |
| <b>CD24</b>    | <b>-260</b>     | <b>&lt;0.001</b> | <b>***</b>  | <b>CD24</b>    | <b>-189</b>     | <b>0.002</b>     | <b>**</b>   |
| CD25           | -12             | >0.99            | ns          | CD25           | -29             | >0.99            | ns          |
| <b>CD29</b>    | <b>-213</b>     | <b>&lt;0.001</b> | <b>***</b>  | <b>CD29</b>    | <b>-240</b>     | <b>&lt;0.001</b> | <b>***</b>  |
| CD31           | -93             | >0.99            | ns          | <b>CD31</b>    | <b>-194</b>     | <b>0.002</b>     | <b>**</b>   |
| CD40           | -59             | >0.99            | ns          | <b>CD40</b>    | <b>-180</b>     | <b>0.005</b>     | <b>**</b>   |
| CD41b          | -124            | 0.32             | ns          | <b>CD41b</b>   | <b>-265</b>     | <b>&lt;0.001</b> | <b>***</b>  |
| CD42a          | -51             | >0.99            | ns          | <b>CD42a</b>   | <b>-271</b>     | <b>&lt;0.001</b> | <b>***</b>  |
| CD44           | -144            | 0.09             | ns          | <b>CD44</b>    | <b>-152</b>     | <b>&lt;0.05</b>  | <b>*</b>    |
| CD45           | -56             | >0.99            | ns          | CD45           | -114            | 0.6              | ns          |
| CD49e          | 0               | >0.99            | ns          | CD49e          | -45             | >0.99            | ns          |
| CD56           | -50             | >0.99            | ns          | CD56           | 0               | >0.99            | ns          |
| CD62P          | -25             | >0.99            | ns          | <b>CD62P</b>   | <b>-267</b>     | <b>&lt;0.001</b> | <b>***</b>  |
| <b>CD63</b>    | <b>-245</b>     | <b>&lt;0.001</b> | <b>***</b>  | <b>CD63</b>    | <b>-278</b>     | <b>&lt;0.001</b> | <b>***</b>  |
| CD69           | -135            | 0.17             | ns          | CD69           | -143            | 0.09             | ns          |
| <b>CD81</b>    | <b>-269</b>     | <b>&lt;0.001</b> | <b>***</b>  | <b>CD81</b>    | <b>-270</b>     | <b>&lt;0.001</b> | <b>***</b>  |
| CD86           | -92             | >0.99            | ns          | CD86           | -67             | >0.99            | ns          |
| <b>CD105</b>   | <b>-174</b>     | <b>0.009</b>     | <b>**</b>   | <b>CD105</b>   | <b>-152</b>     | <b>&lt;0.05</b>  | <b>*</b>    |
| <b>CD133-1</b> | <b>-261</b>     | <b>&lt;0.001</b> | <b>***</b>  | <b>CD133-1</b> | <b>-147</b>     | <b>&lt;0.05</b>  | <b>*</b>    |
| CD142          | -88             | >0.99            | ns          | CD142          | -23             | >0.99            | ns          |
| <b>CD146</b>   | <b>-203</b>     | <b>&lt;0.001</b> | <b>***</b>  | CD146          | -83             | >0.99            | ns          |
| CD209          | -25             | >0.99            | ns          | CD209          | -29             | >0.99            | ns          |
| <b>CD326</b>   | <b>-291</b>     | <b>&lt;0.001</b> | <b>***</b>  | CD326          | -58             | >0.99            | ns          |
| <b>HLA-I</b>   | <b>-172</b>     | <b>0.01</b>      | <b>*</b>    | <b>HLA-I</b>   | <b>-179</b>     | <b>0.006</b>     | <b>**</b>   |
| <b>HLA-II</b>  | <b>-269</b>     | <b>&lt;0.001</b> | <b>***</b>  | <b>HLA-II</b>  | <b>-231</b>     | <b>&lt;0.001</b> | <b>***</b>  |
| MCSP           | -46             | >0.99            | ns          | MCSP           | -50             | >0.99            | ns          |
| <b>ROR1</b>    | <b>-218</b>     | <b>&lt;0.001</b> | <b>***</b>  | <b>ROR1</b>    | <b>-184</b>     | <b>0.004</b>     | <b>**</b>   |
| SSEA-4         | -101            | >0.99            | ns          | SSEA-4         | -38             | >0.99            | ns          |

**Supplementary Table S4. Statistical analysis to define proteins below the isotype threshold (non-detected) and above the isotype threshold (expressed on EVs).** Significance was determined by non-parametric Kruskal-Wallis Test with post-hoc Dunn's multiple comparison test isotype VS protein signals.. Significance: ns (p≥0.05), \* (p<0.05), \*\* (p<0.01), \*\*\* (p<0.001).

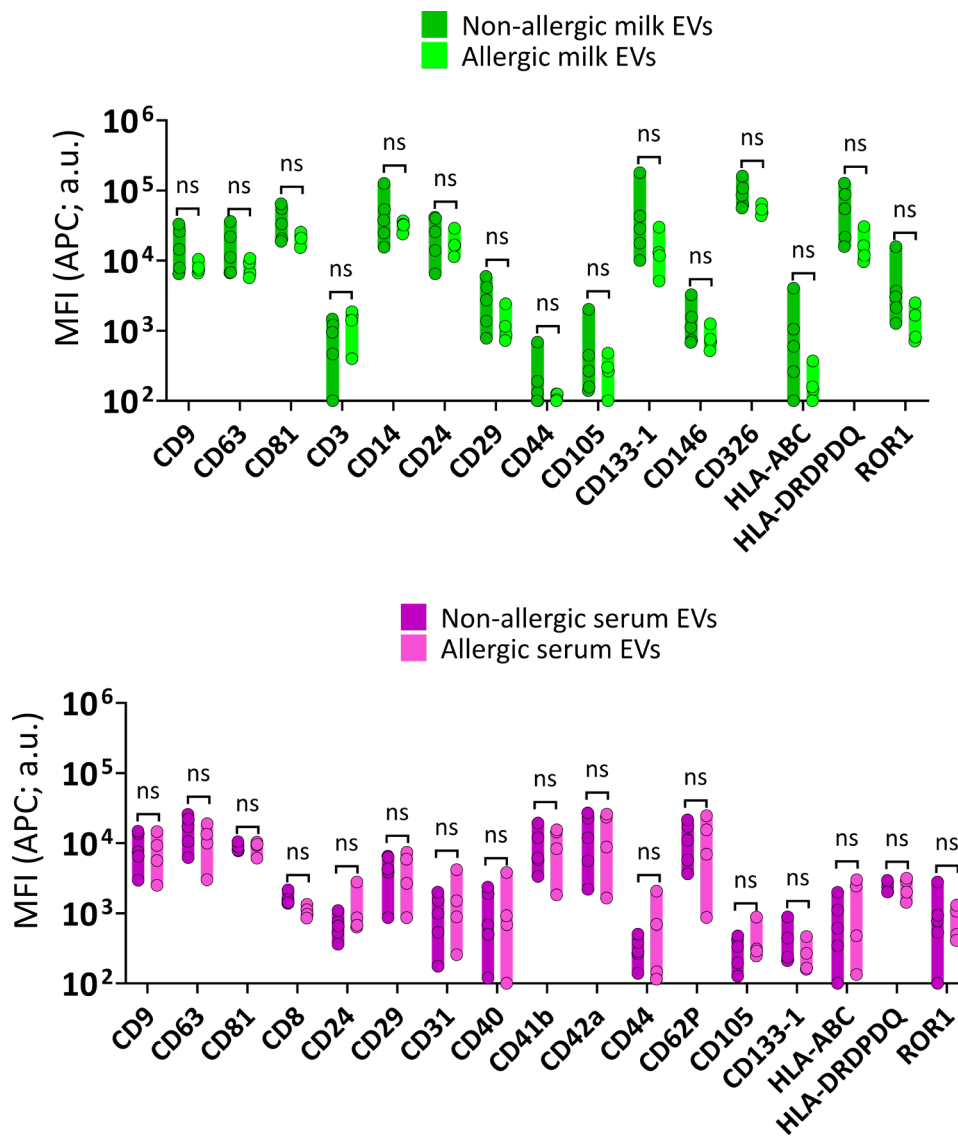

**Supplementary Figure S4. Comparison of EVs from non-allergic and allergic donors.** MFI APC signals of pan-tetraspanin detection associated to surface proteins identified in milk and/or serum EVs (Figure 3) was compared between milk EVs and serum EVs from non-allergic (n=5 donors) and allergic (n=4 donors) mothers. Significance differences between non-allergic and allergic groups was assessed by multiple non-parametric Mann Whitney test with Holm-Šídák multiple comparison method. a.u. = arbitrary unit.

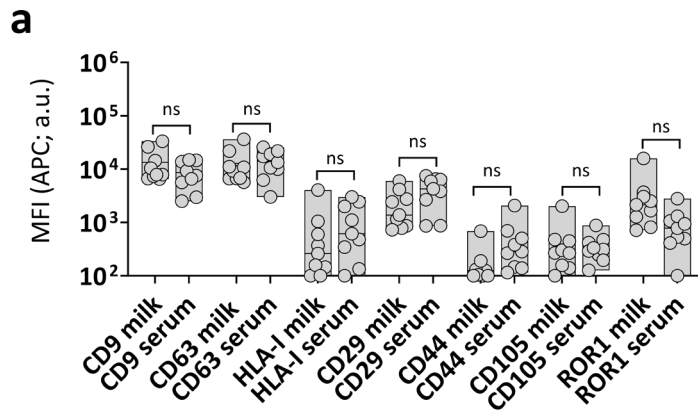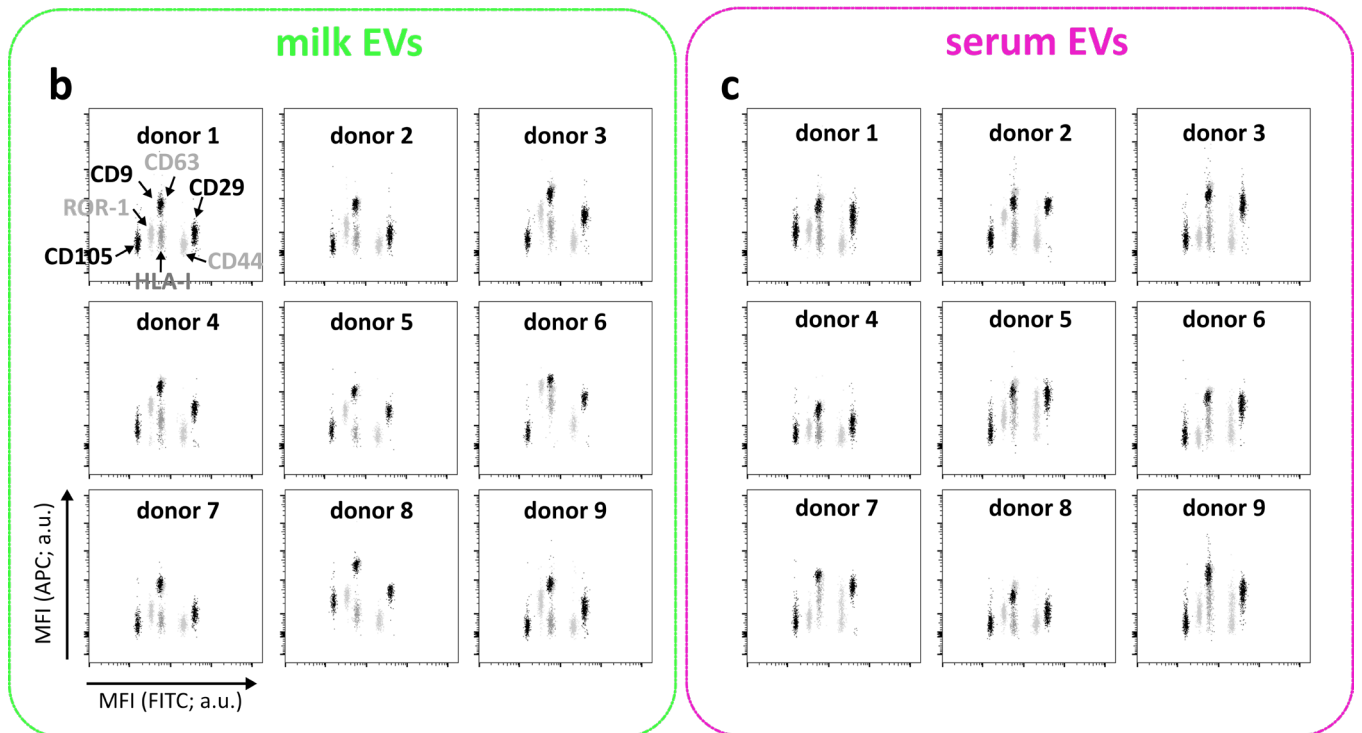

**Supplementary Figure S5. Identification of common milk and serum EV proteins. (a)** Indicated are the MFI APC pan-tetraspanin signals of  $n=9$  individual EV samples associated to EV proteins similarly expressed on milk and serum EVs. **(b)** Corresponding flow cytometry dotplots of the  $n=9$  individual EV samples of proteins depicted in (a).  $p \geq 0.05$  (ns), non-parametric paired T test (Wilcoxon test). a.u. = arbitrary unit.

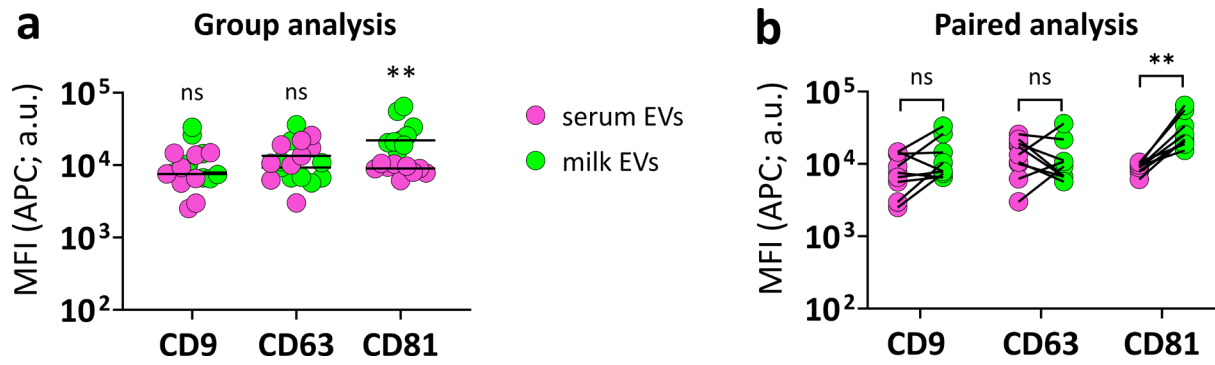

**Supplementary Figure S6. Comparison of CD9, CD63 and CD81 bead capture signals in milk and serum EVs with pan-tetraspanin detection. (a) Comparison between milk and serum EVs (n=9 samples/group). Lines represent the medians. (b) Paired analysis of milk and serum EVs of individual donors (n=9 donors).  $p \geq 0.05$  (ns),  $p < 0.01$  (\*\*), Paired T test nonparametric (Wilcoxon test). a.u. = arbitrary unit.**

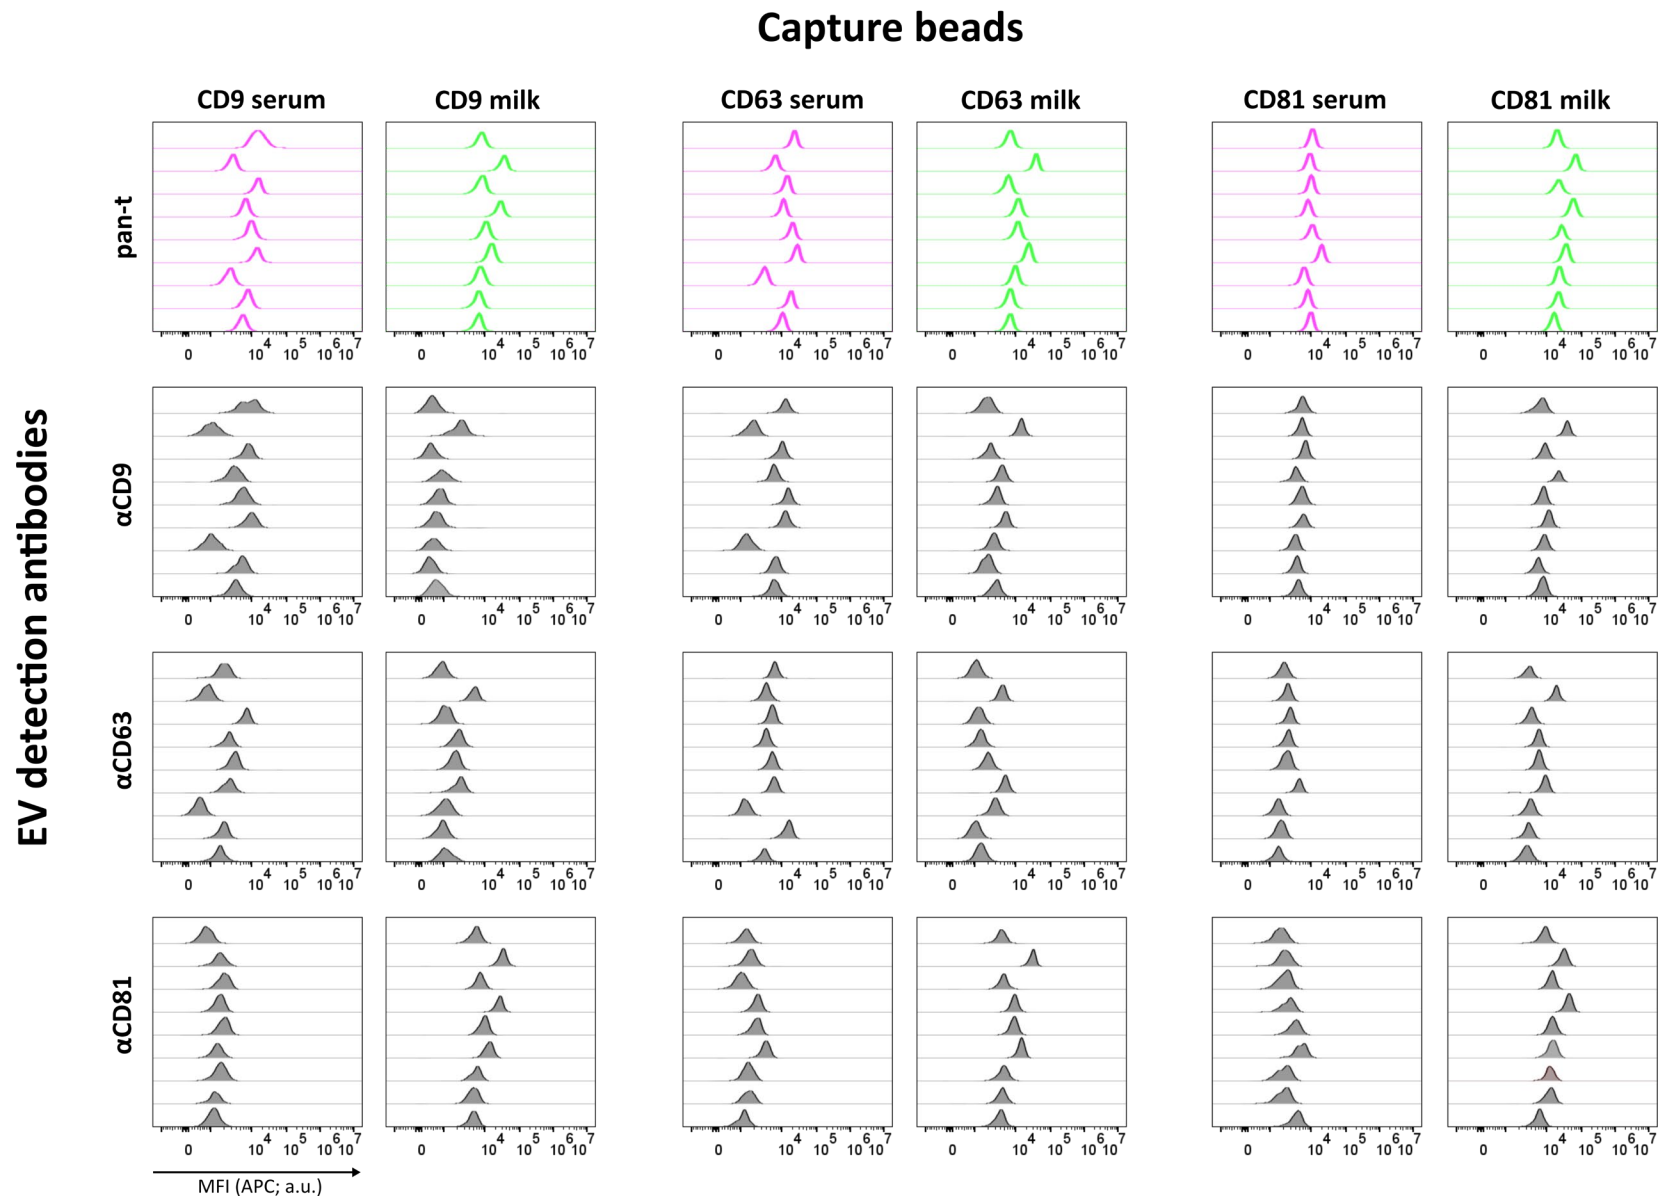

**Supplementary Figure S7.** Flow cytometry histograms representing MFI APC (x-axis) of CD9, CD63, CD81 capture bead populations incubated with milk EVs or serum EVs (n= 9 donors) and detected with pan-tetraspanin detection (pan-t) or single tetraspanin detection ( $\alpha$ CD9,  $\alpha$ CD63 or  $\alpha$ CD81). a.u. = arbitrary unit.

# EV detection antibodies

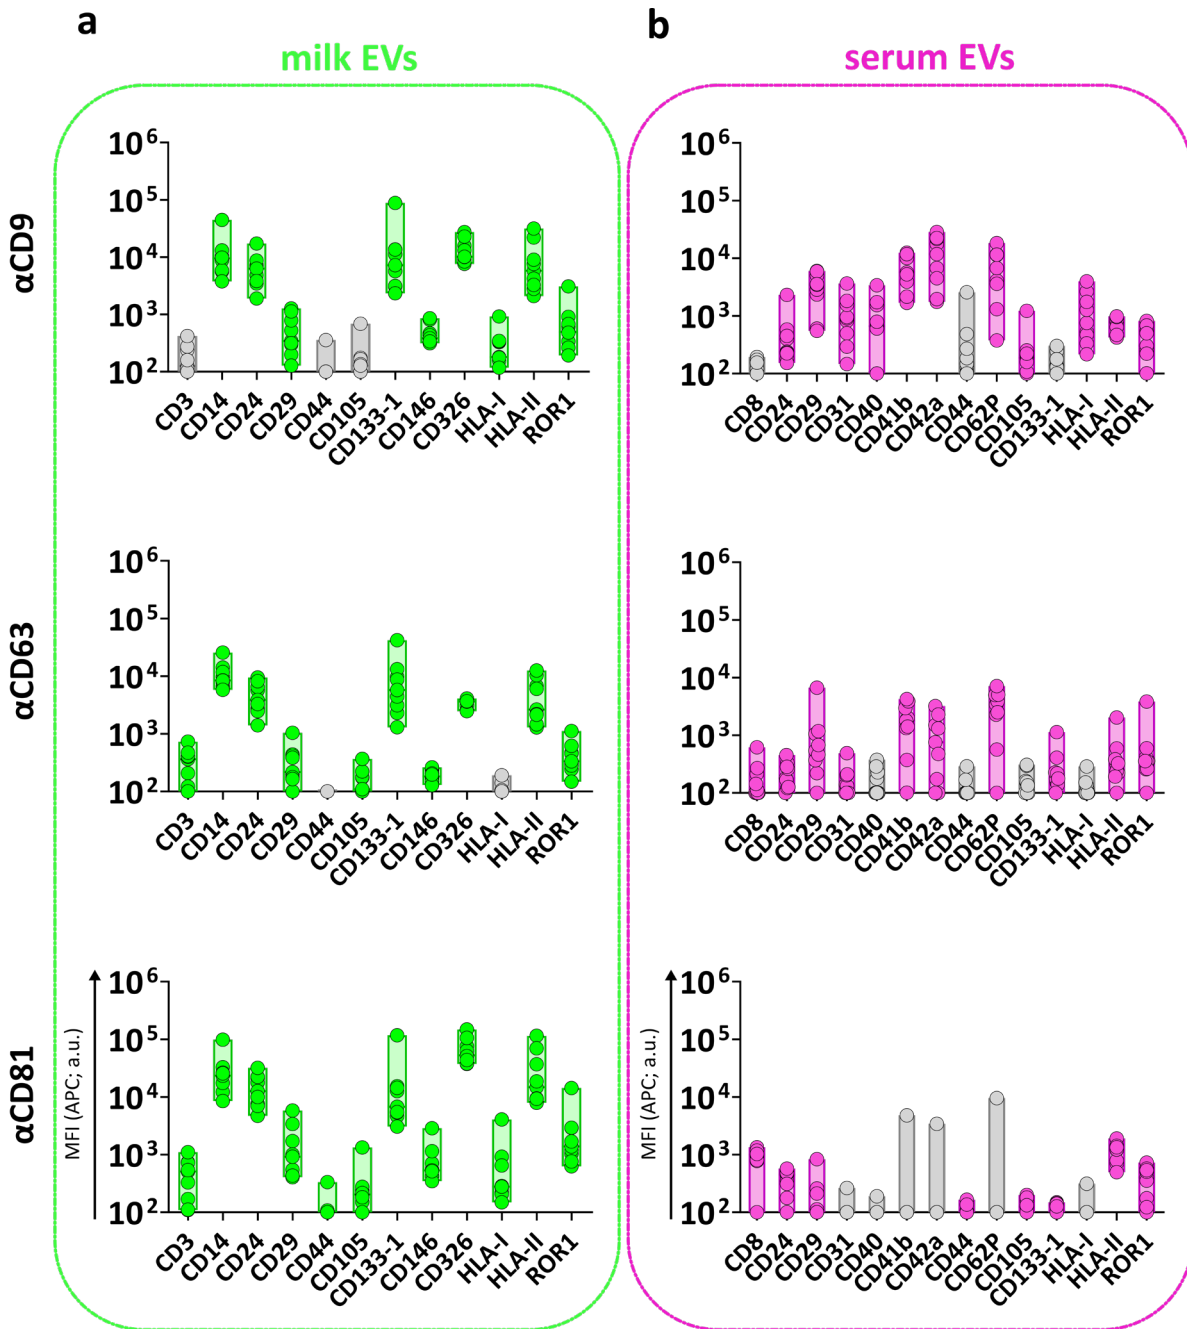

**Supplementary Figure S8. The MFI APC of single tetraspanin detection on EVs bound to capture bead populations identified by pan-tetraspanin detection.** Single tetraspanin detection was performed with  $\alpha$ CD9,  $\alpha$ CD63 or  $\alpha$ CD81 antibody on milk EVs (a) and serum EVs (b). Tetraspanin capture beads CD9, CD63 and CD81 are not included in this figure (Data are presented in Figure 5 and Supplementary Figure S7). Grey bars indicate non-significant detection compared to isotype control. a.u. = arbitrary unit.
